# Supplementary material for: Isolation and Functional Gene Analyses of Aromatic-Hydrocarbon-Degrading Bacteria from a Polychlorinated-Dioxin-Dechlorinating Process
Source: PubMed Central journal article supplement (PMC4036015; doi:10.1264/jsme2.me11283), 2011-12-06

1 Supplemental tables

2 **Table S1.** PCR primers used for molecular analyses of DF-degrading bacteria

| PCR strategy and target regions      | Primer name | Direction | Sequence (5' - 3')       |
|--------------------------------------|-------------|-----------|--------------------------|
| Standard PCR                         |             |           |                          |
| AhDOa                                | PAH2f       | Forward   | TCVBSTGCMVYTAYCAYGGYTGG  |
|                                      | PAH3r1      | Reverse   | TCAYCYGKTCCYYTMGGRTGCCA  |
|                                      | PAH3r2      | Reverse   | TYATBSGGMCCVMKCGGVTGCCA  |
|                                      | PAH4r       | Reverse   | CSATSRMATASKTCCA VACYTCG |
|                                      | PAH5r       | Reverse   | CCRTCRTCSKGBKCRAAHAMACC  |
| <i>Paenibacillus</i> DbfA1           | YDA1f       | Forward   | GGAGCAGCATGTAGTCAGAG     |
|                                      | YDA1r       | Reverse   | GATCCAGCAAGTGAGCTTCG     |
| Inverse PCR for <i>Paenibacillus</i> |             |           |                          |
| sp. TSY30                            |             |           |                          |
| 1, 2, 3*                             | EHNf        | Forward   | AGTCCCAAGTCCAAAGCCAGAC   |
| 1, 2, 3, 5                           | EHNPr       | Reverse   | CTTCCAGTTCGCATGAACGACC   |
| 4, 8                                 | NN-2f       | Forward   | ATGATCCGGTACTGTTGGTGCG   |
| 4                                    | NS-1r       | Reverse   | TCCTGCTGGTAGGCCATAAACG   |
| 5                                    | Pst-1f      | Forward   | TCTGATCATTGCGGTGTCGCTG   |
| 6                                    | SacI-1f     | Forward   | AGCCTTGATGGAGGACTACGAG   |
| 6, 8                                 | SN-5r       | Reverse   | GCAGCAATCCCAGATGATCTCG   |
| 7                                    | Not-1f      | Forward   | GTTCAAGGATACGGATCTGGCC   |
| 7                                    | Not-2r      | Reverse   | GTGACTGCGAACGCTTAGTTCC   |
| Inverse PCR for <i>Rhizobium</i> sp. |             |           |                          |
| TSY03b                               |             |           |                          |

|             |        |         |                        |
|-------------|--------|---------|------------------------|
| 10, 12, 15* | HNX1f  | Forward | ATGATGATCTACCGCACGCGGC |
| 10, 11      | HN-1r  | Reverse | ACCATAGGTGTACGCGAAGC   |
| 11          | Nco-1f | Forward | GACTGACAACGAAACCTTCGCC |
| 12          | Nde-1r | Reverse | TTGGCAATCTGCGACTCATGGC |
| 13          | Sal-1f | Forward | GAATCTGTCGTTCTGGCAG    |
| 13, 15      | SX-1r  | Reverse | GATGACCCACTTCTGGATGC   |
| 14          | Sal-2f | Forward | GATACGTGGAAGAGGGTGCAC  |
| 14          | Sal-2r | Reverse | CAGCTTGCAGATCAGGATCGG  |

Real-time qPCR for AhDOa

from:

|                                   |           |         |                            |
|-----------------------------------|-----------|---------|----------------------------|
| <i>Paenibacillus</i> sp. (NidA1)  | TSY30n-2f | Forward | TGGGTCGTTTCATGCGAACTG      |
|                                   | TSY30n-2r | Reverse | CCACATTTCTTGC GGCAACC      |
| <i>Paenibacillus</i> sp. (DbfA1)  | TSY30d-1f | Forward | TTGAAGTGGCAGGTCCCATC       |
|                                   | TSY30d-1r | Reverse | CGATCCAATTCCAGACCCAC       |
| <i>Rhizobium</i> sp. TSY03b       | TSY03b-1f | Forward | GCACGACCTCACATCTGTCCGGCATC |
|                                   | TSY03b-1r | Reverse | GACACAAGTGTACATCGGTCCGCGAC |
| <i>N. naphthalenivorans</i> DF261 | DF261-1f  | Forward | GGAGCCCATCTTCAAGCACTCA     |
|                                   | DF261-1r  | Reverse | CCGGAATAAGCGTCCCACAACA     |

3 \* Figures correspond to the DNA fragment regions shown in Fig. 1b and 1d.

4

5 **Table S2.** Deduced ORFs found in the 7.3 kb nucleotide stretch of cloned DNA from  
6 *Paenibacillus* sp. strain TSY30

| ORF | Position in<br>accession<br>no. | Calculated<br>molecular<br>mass (Da) | BLAST homology search for protein |                                                           |                                         |                     |
|-----|---------------------------------|--------------------------------------|-----------------------------------|-----------------------------------------------------------|-----------------------------------------|---------------------|
|     |                                 |                                      | %<br>Identity                     | Protein/function                                          | Closest relative as host<br>organism    | Accession<br>number |
| 1   | 56–925                          | 32,812                               | 65                                | 5-Carboxymethyl-2-hydroxyruconate<br>delta-isomerase      | <i>Bacillus tusciae</i> DSM 2912        | YP_003590136        |
| 2   | 944–2137                        | 44,718                               | 55                                | Monoxygenase FAD-binding protein                          | <i>Geobacillus</i> sp. Y412MC61         | ZP_04392202         |
| 3   | 2205–3533                       | 50,860                               | 63                                | Aromatic-ring-hydroxylating<br>dioxygenase, alpha subunit | <i>Geobacillus</i> sp. Y4.1MC1          | ZP_05373195         |
| 4   | 3552–4049                       | 19,431                               | 59                                | Aromatic-ring-hydroxylating<br>dioxygenase, beta subunit  | <i>Geobacillus</i> sp. Y4.1MC1          | ZP_05373196         |
| 5   | 4106–4987                       | 31,337                               | 40                                | Inner-membrane translocator                               | <i>Geobacter lovleyi</i> SZ             | YP_001952098        |
| 6   | 5027–6022                       | 35,919                               | 41                                | Inner-membrane translocator                               | <i>Geobacter uraniumreducens</i><br>Rf4 | ZP_01141122         |
| 7   | 6019–6810                       | 28,905                               | 50                                | ABC transporter-related ATP-binding<br>protein            | <i>Acidiphilium cryptum</i> JF-5        | YP_001233501        |
| 8   | 6798-7348*                      | –                                    | 56                                | ABC transporter                                           | <i>Paenibacillus</i> sp. D14            | ZP_04853801         |

7 \* Incomplete sequence in the 3' region.

8

9 **Table S3.** Deduced ORFs found in the 5.9 kb nucleotide stretch of cloned DNA from  
 10 *Rhizobium* sp. strain TSY03b

| ORF | Position in<br>accession<br>no. | Calculated<br>molecular<br>mass (Da) | BLAST homology search for protein |                                                                    |                                                   |                     |
|-----|---------------------------------|--------------------------------------|-----------------------------------|--------------------------------------------------------------------|---------------------------------------------------|---------------------|
|     |                                 |                                      | %<br>Identity                     | Protein/function                                                   | Closest relative as host<br>organism              | Accession<br>number |
| 1   | 898–1*                          | –                                    | 89                                | TRAP transporter solute receptor, TAXI<br>family                   | <i>Polymorphum gilvum</i><br>SL003B-26A1          | YP_004305816        |
| 2   | 1106–2466                       | 50,644                               | 94                                | IPB-dioxygenase, ISP large subunit                                 | <i>Polymorphum gilvum</i><br>SL003B-26A1          | YP_004305818        |
| 3   | 2536–3111                       | 22,832                               | 91                                | Biphenyl 2,3-dioxygenase beta subunit                              | <i>Polymorphum gilvum</i><br>SL003B-26A1          | YP_004305819        |
| 4   | 3122–3427                       | 11,007                               | 71                                | Ferredoxin                                                         | <i>Xanthobacter</i><br><i>polyaromaticivorans</i> | BAC98958            |
| 5   | 3461–4294                       | 29,127                               | 89                                | Short-chain dehydrogenase/reductase<br>(dihydrodiol dehydrogenase) | <i>Polymorphum gilvum</i><br>SL003B-26A1          | YP_004305821        |
| 6   | 4450–5901                       | 51,690                               | 90                                | Dehydrogenase PhnF                                                 | <i>Polymorphum gilvum</i><br>SL003B-26A1          | YP_004305822        |

11 \*Incomplete sequence in the complementary 3' region.

12

13 Supplemental figures

14 Fig. S1. Absorption spectra of the yellow-pigmented DF-degrading cultures of  
15 *Paenibacillus* sp. strain TSY30 (a) and *Rhizobium* sp. strain TSY03b (b). DF in the  
16 culture of *Rhizobium* sp. strain TSY03b was degraded co-metabolically in the presence  
17 of naphthalene. Spectral patterns of the pigmented supernatant in response to changes in  
18 pH are shown.

19 Fig. S2. Southern hybridization of digested genomic DNA of *Paenibacillus* sp. strain  
20 TSY30 (a, b) and *Rhizobium* sp. strain TSY03b (c, d) with a labeled PCR clone as the  
21 probe. The probes used were the PCR clone with primers PAH2f/PHA3r2 (*nidA1*) for  
22 *Paenibacillus* sp. strain TSY30 and that with primers PAH2f/PHA5r (*nidA1*) for  
23 *Rhizobium* sp. strain TSY03b. (a, c), Agarose electrophoresis with ethidium bromide  
24 staining of genomic DNA digested with restriction enzymes, *EcoRI*, *NotI*, *SalI*, *PstI*, and  
25 *SacI*; (b, d), hybridization signals on the nylon membrane to which the digested DNAs  
26 were transferred. Positive controls are indicated in lane P.

27

Kaiya et al. Fig. S1

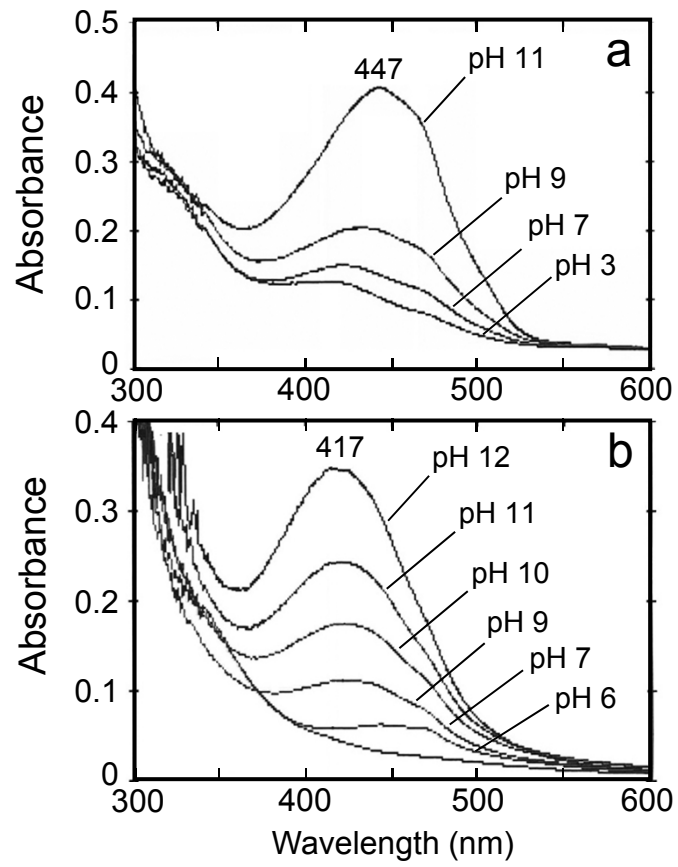

Kaiya et al. Fig. S2

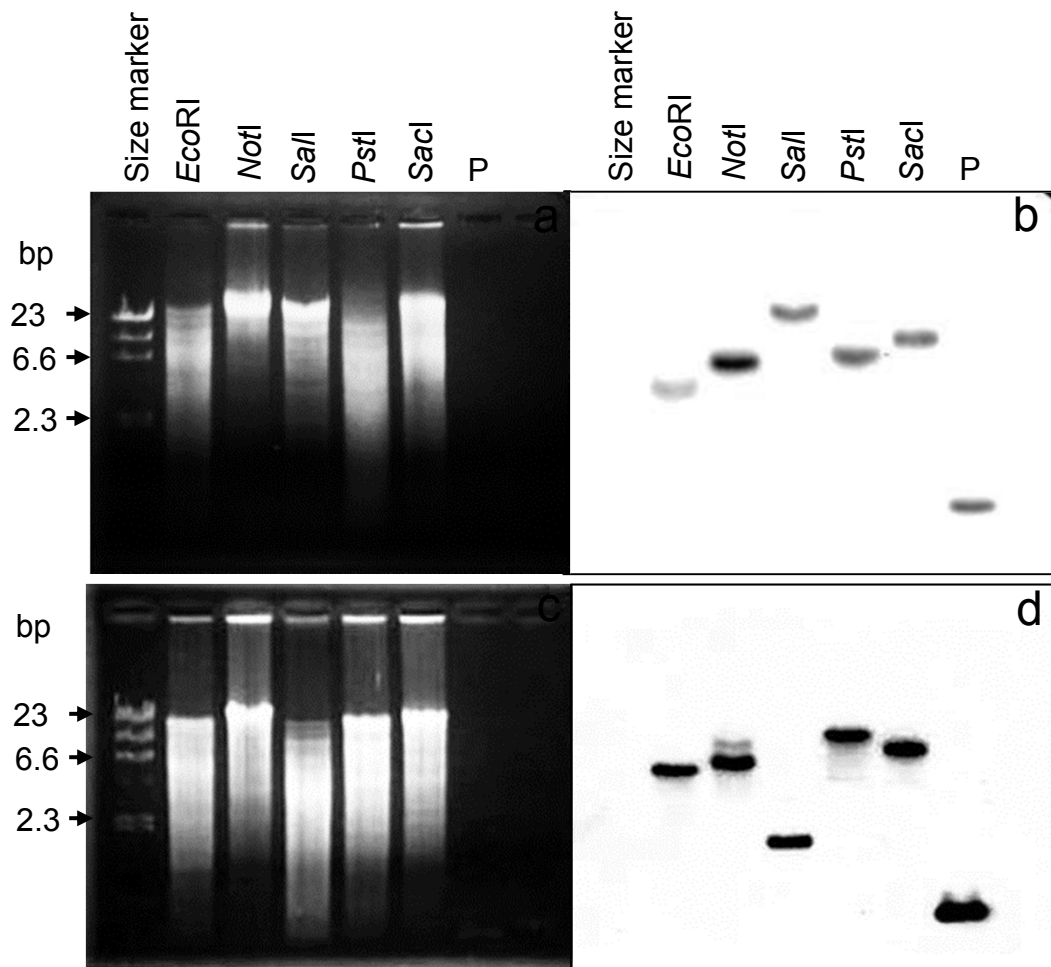

Supplement: 27_127_s1.pdf [file 27_127_s1.pdf]
